# Supplementary material
Source: Research Square preprint supplement (doi:10.21203/rs.3.rs-9687249/v1)

**YAP1 Phase Separation Drives Nuclear Condensation to Control R-loop Homeostasis and Endometrial Stromal Cell Senescence in PCOS-related Recurrent Spontaneous Abortion**

Ming-Li Dong#, Qing-Zhi Zhai#, Yi-Zhuo Yang, Hong-Mei Peng, Sha Mu & Yuan Gao*

Senior Department of Obstetrics & Gynecology, the Seventh Medical Center of PLA General Hospital, Beijing 100700, China.

# Ming-Li Dong and Qing-Zhi Zhai are the co-first author.

*Corresponding author: Yuan Gao(E-mail: gaoyuan_324@aliyun.com)Senior Department of Obstetrics & Gynecology, the Seventh Medical Center of PLA General Hospital, Beijing 100700, China.

**Supplementary Fig. S1 IDR-dependent phase separation characteristics of YAP1 and validation in vitro and in cells.**

(A) Representative images of subcellular localization of full-length YAP1 (FL), N-terminal truncated YAP1 (1–163 aa), C-terminal truncated YAP1 (273–381 aa), and YAP1 condensate dissolution after 5% 1,6-hexanediol treatment in ESCs. Scale bar, 5 μm.

(B) Representative fluorescent images of ESCs expressing empty vector, YAP1-EGFP, YAP1-EGFP (ΔIDR), and YAP1-EGFP after 5% 1,6-hexanediol treatment. Scale bar, 5 μm.

(C) In vitro phase separation of purified GFP-YAP1 protein at gradient concentrations (2, 4, 8, 16 μM). Scale bar, 20 μm.

(D) In vitro phase separation of GFP-YAP1 under gradient protein concentrations and NaCl conditions to validate salt-dependent LLPS behavior. Scale bar, 20 μm.


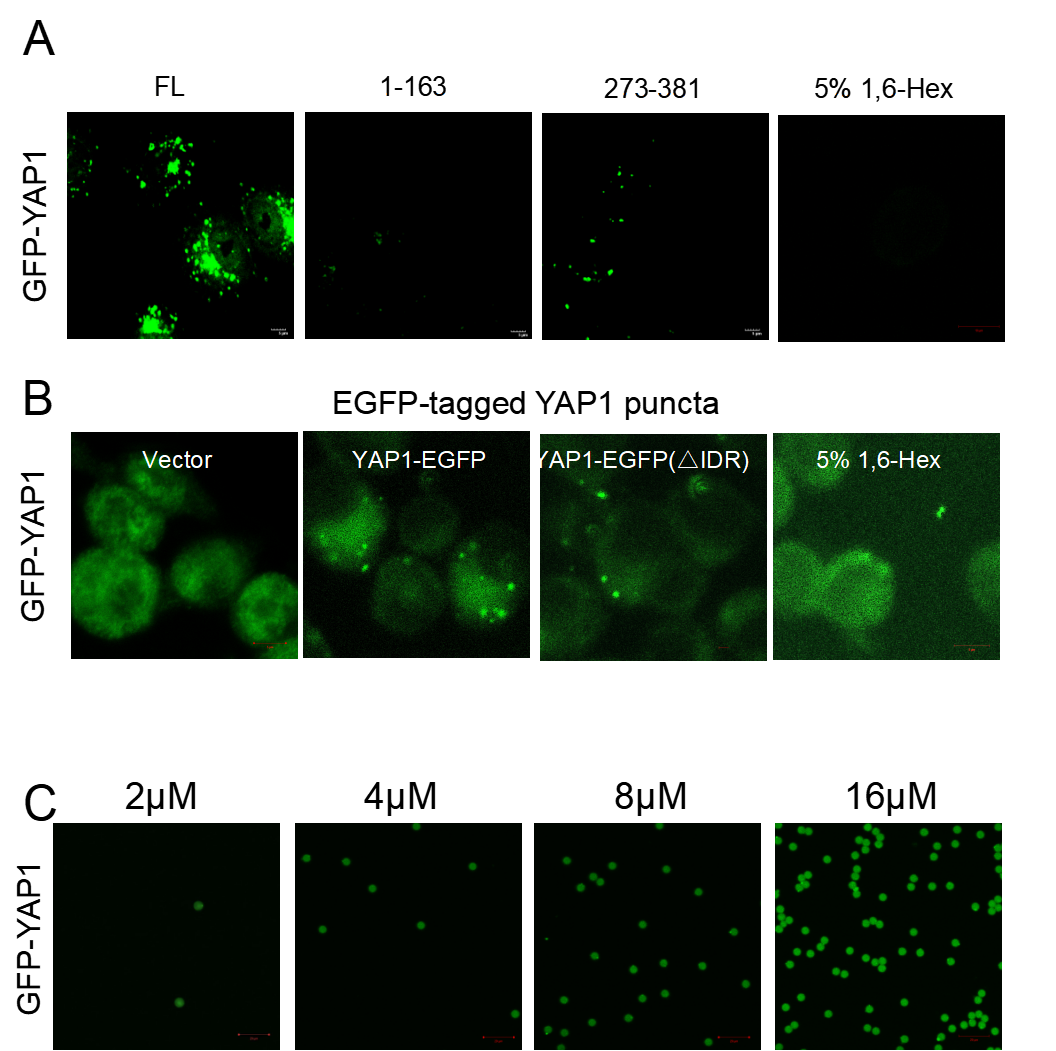


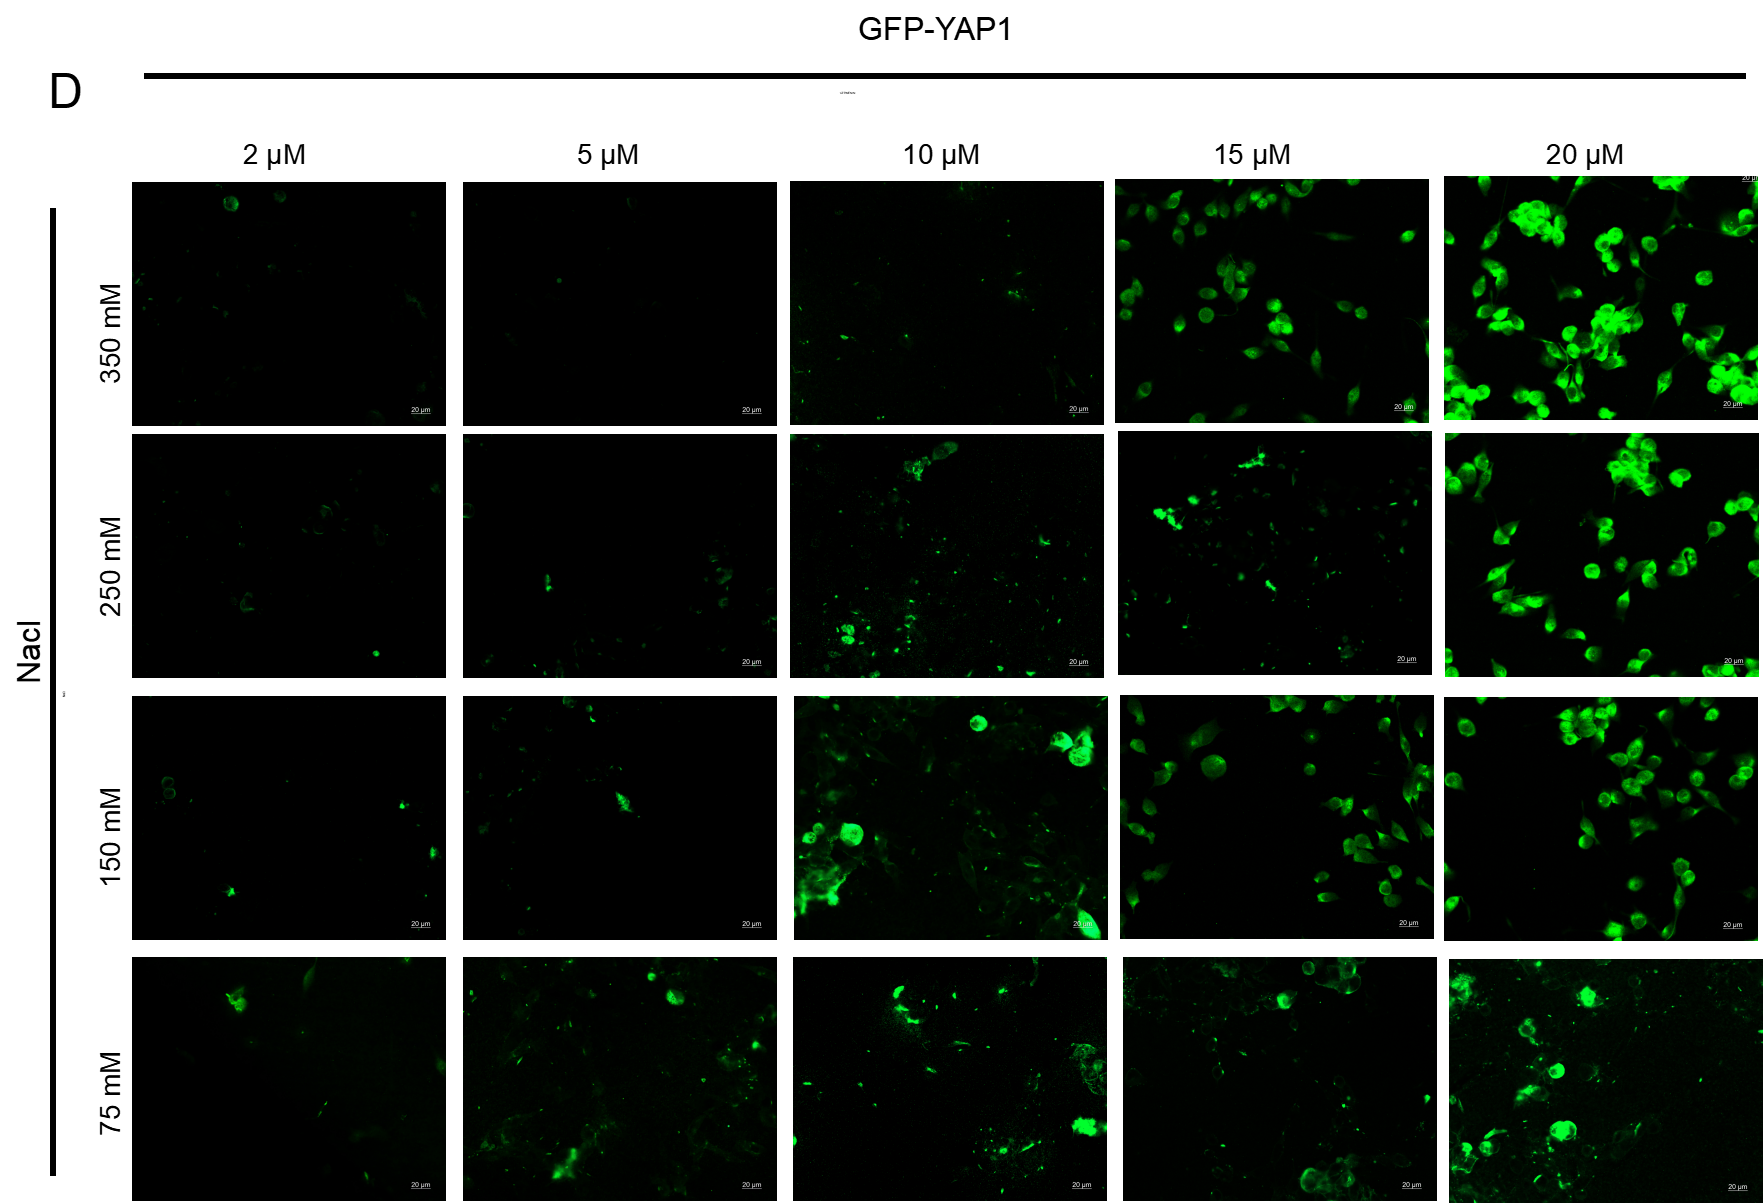

Supplement: Supplementary file 1 [file 2134a59c96155596ae19126b.doc]
